# Supplementary material for: [Fe(abpt)2(NCSe)2] polymorph A: structural studies into the spin crossover behaviour
Source: Royal Society of Chemistry journal article supplement (doi:10.1039/c8nj03627f), 2018-01-01
Supplement: c8nj03627f1.pdf [file c8nj03627f1.pdf]

## Supplementary Information

### **[Fe(abpt)<sub>2</sub>(NCSe)<sub>2</sub>] polymorph A: Structural studies into the spin crossover behaviour**

**Helen E. Mason,<sup>a</sup> Michelle L. Hamilton,<sup>b</sup> Judith A. K. Howard<sup>a</sup> and Hazel A. Sparkes<sup>c\*</sup>**

<sup>a</sup> Department of Chemistry, Durham University, South Road, Durham, DH1 3LE, UK.

<sup>b</sup> RAL Space, STFC, Rutherford Appleton Laboratory, Didcot, OX11 0QX, UK.

<sup>c</sup> Department of Chemistry, University of Bristol, Cantock's Close, Bristol, BS8 1TS, UK. E-mail: [hazel.sparkes@bristol.ac.uk](mailto:hazel.sparkes@bristol.ac.uk).

**Table S1** - Crystal data and refinement results for **A** at 50 K, 75 K, 100 K, 108 K, 125 K and 150 K.

|                                                       | <b>50(2) K</b>                                                      | <b>75(2) K</b>                                                      | <b>100(2) K</b>                                                     | <b>108(2) K</b>                                                     | <b>125(2) K</b>                                                     | <b>150(2) K</b>                                                    |
|-------------------------------------------------------|---------------------------------------------------------------------|---------------------------------------------------------------------|---------------------------------------------------------------------|---------------------------------------------------------------------|---------------------------------------------------------------------|--------------------------------------------------------------------|
| Empirical formula                                     | C <sub>26</sub> H <sub>20</sub> FeN <sub>14</sub> Se <sub>2</sub>   | C <sub>26</sub> H <sub>20</sub> FeN <sub>14</sub> Se <sub>2</sub>   | C <sub>26</sub> H <sub>20</sub> FeN <sub>14</sub> Se <sub>2</sub>   | C <sub>26</sub> H <sub>20</sub> FeN <sub>14</sub> Se <sub>2</sub>   | C <sub>26</sub> H <sub>20</sub> FeN <sub>14</sub> Se <sub>2</sub>   | C <sub>26</sub> H <sub>20</sub> FeN <sub>14</sub> Se <sub>2</sub>  |
| Formula weight                                        | 742.33                                                              | 742.33                                                              | 742.33                                                              | 742.33                                                              | 742.33                                                              | 742.33                                                             |
| Temperature / K                                       | 50(2)                                                               | 75(2)                                                               | 100(2)                                                              | 108(2)                                                              | 125(2)                                                              | 150(2)                                                             |
| Crystal system                                        | monoclinic                                                          | monoclinic                                                          | monoclinic                                                          | monoclinic                                                          | monoclinic                                                          | monoclinic                                                         |
| Space group                                           | P2 <sub>1</sub> /n                                                  | P2 <sub>1</sub> /n                                                 |
| <i>a</i> / Å                                          | 8.4368(5)                                                           | 8.4405(5)                                                           | 8.4499(6)                                                           | 8.4550(6)                                                           | 8.4560(3)                                                           | 8.4649(4)                                                          |
| <i>b</i> / Å                                          | 9.9497(6)                                                           | 9.9558(6)                                                           | 9.9648(6)                                                           | 9.9691(7)                                                           | 9.9693(4)                                                           | 9.9787(5)                                                          |
| <i>c</i> / Å                                          | 16.3497(10)                                                         | 16.3563(9)                                                          | 16.3673(10)                                                         | 16.3559(11)                                                         | 16.3570(7)                                                          | 16.3697(8)                                                         |
| $\beta$ / °                                           | 93.1257(13)                                                         | 93.1270(10)                                                         | 93.1342(13)                                                         | 93.0618(13)                                                         | 93.0825(7)                                                          | 93.0951(9)                                                         |
| <i>V</i> / Å <sup>3</sup>                             | 1370.41(14)                                                         | 1372.40(14)                                                         | 1376.09(15)                                                         | 1376.65(17)                                                         | 1376.91(9)                                                          | 1380.71(12)                                                        |
| <i>Z</i>                                              | 2                                                                   | 2                                                                   | 2                                                                   | 2                                                                   | 2                                                                   | 2                                                                  |
| $\rho_{\text{calc}}$ / (g/cm <sup>3</sup> )           | 1.799                                                               | 1.796                                                               | 1.792                                                               | 1.791                                                               | 1.790                                                               | 1.786                                                              |
| $\mu$ / mm <sup>-1</sup>                              | 3.254                                                               | 3.249                                                               | 3.240                                                               | 3.239                                                               | 3.239                                                               | 3.230                                                              |
| F(000)                                                | 736.0                                                               | 736.0                                                               | 736.0                                                               | 736.0                                                               | 736.0                                                               | 736.0                                                              |
| Radiation                                             | MoK $\alpha$ ( $\lambda$ = 0.71073)                                 | MoK $\alpha$ ( $\lambda$ = 0.71073)                                |
| 2 $\theta$ range for data collection / °              | 4.794 to 56.55                                                      | 4.792 to 56.56                                                      | 4.788 to 56.552                                                     | 4.788 to 56.562                                                     | 4.786 to 56.532                                                     | 4.782 to 55.748                                                    |
| Index ranges                                          | -11 ≤ <i>h</i> ≤ 10,<br>-12 ≤ <i>k</i> ≤ 13,<br>-21 ≤ <i>l</i> ≤ 19 | -11 ≤ <i>h</i> ≤ 11,<br>-13 ≤ <i>k</i> ≤ 13,<br>-21 ≤ <i>l</i> ≤ 21 | -11 ≤ <i>h</i> ≤ 10,<br>-12 ≤ <i>k</i> ≤ 13,<br>-21 ≤ <i>l</i> ≤ 19 | -11 ≤ <i>h</i> ≤ 11,<br>-13 ≤ <i>k</i> ≤ 11,<br>-20 ≤ <i>l</i> ≤ 21 | -11 ≤ <i>h</i> ≤ 11,<br>-13 ≤ <i>k</i> ≤ 13,<br>-20 ≤ <i>l</i> ≤ 21 | -11 ≤ <i>h</i> ≤ 11,<br>-13 ≤ <i>k</i> ≤ 8,<br>-16 ≤ <i>l</i> ≤ 21 |
| Reflections collected                                 | 9150                                                                | 21905                                                               | 9170                                                                | 11504                                                               | 15248                                                               | 9538                                                               |
| R <sub>int</sub> / R <sub>sigma</sub>                 | 0.0328 / 0.0397                                                     | 0.0388 / 0.0245                                                     | 0.0322 / 0.0386                                                     | 0.0306 / 0.0313                                                     | 0.0336 / 0.0279                                                     | 0.0287 / 0.0329                                                    |
| Data/restraints/parameters                            | 3380/0/202                                                          | 3400/0/202                                                          | 3399/0/202                                                          | 3424/0/202                                                          | 3421/0/202                                                          | 3282/0/202                                                         |
| Goodness-of-fit on F <sup>2</sup>                     | 1.070                                                               | 1.091                                                               | 1.047                                                               | 1.075                                                               | 1.093                                                               | 1.079                                                              |
| Final R indexes [ <i>I</i> ≥ 2 $\sigma$ ( <i>I</i> )] | R <sub>1</sub> = 0.0352,<br>wR <sub>2</sub> = 0.0742                | R <sub>1</sub> = 0.0320,<br>wR <sub>2</sub> = 0.0696                | R <sub>1</sub> = 0.0356,<br>wR <sub>2</sub> = 0.0753                | R <sub>1</sub> = 0.0321,<br>wR <sub>2</sub> = 0.0662                | R <sub>1</sub> = 0.0311,<br>wR <sub>2</sub> = 0.0655                | R <sub>1</sub> = 0.0325,<br>wR <sub>2</sub> = 0.0671               |
| Final R indexes [all data]                            | R <sub>1</sub> = 0.0437,<br>wR <sub>2</sub> = 0.0769                | R <sub>1</sub> = 0.0385,<br>wR <sub>2</sub> = 0.0719                | R <sub>1</sub> = 0.0454,<br>wR <sub>2</sub> = 0.0785                | R <sub>1</sub> = 0.0397,<br>wR <sub>2</sub> = 0.0687                | R <sub>1</sub> = 0.0384,<br>wR <sub>2</sub> = 0.0679                | R <sub>1</sub> = 0.0416,<br>wR <sub>2</sub> = 0.0702               |
| Largest diff. peak/hole / (e Å <sup>-3</sup> )        | 0.81/-0.65                                                          | 0.86/-0.69                                                          | 0.93/-0.61                                                          | 0.72/-0.66                                                          | 0.66/-0.63                                                          | 0.73/-0.69                                                         |

**Table S1 continued** - Crystal data and refinement results for **A** at 175 K, 200 K, 225 K, 250 K, 275 K and 300 K.

|                                                              | 175(2) K                                                           | 200(2) K                                                            | 225(2) K                                                           | 250(2) K                                                           | 275(2) K                                                            | 300(2) K                                                            |
|--------------------------------------------------------------|--------------------------------------------------------------------|---------------------------------------------------------------------|--------------------------------------------------------------------|--------------------------------------------------------------------|---------------------------------------------------------------------|---------------------------------------------------------------------|
| Empirical formula                                            | C <sub>26</sub> H <sub>20</sub> FeN <sub>14</sub> Se <sub>2</sub>  | C <sub>26</sub> H <sub>20</sub> FeN <sub>14</sub> Se <sub>2</sub>   | C <sub>26</sub> H <sub>20</sub> FeN <sub>14</sub> Se <sub>2</sub>  | C <sub>26</sub> H <sub>20</sub> FeN <sub>14</sub> Se <sub>2</sub>  | C <sub>26</sub> H <sub>20</sub> FeN <sub>14</sub> Se <sub>2</sub>   | C <sub>26</sub> H <sub>20</sub> FeN <sub>14</sub> Se <sub>2</sub>   |
| Formula weight                                               | 742.33                                                             | 742.33                                                              | 742.33                                                             | 742.33                                                             | 742.33                                                              | 742.33                                                              |
| Temperature / K                                              | 175(2)                                                             | 200(2)                                                              | 225(2)                                                             | 250(2)                                                             | 275(2)                                                              | 300(2)                                                              |
| Crystal system                                               | monoclinic                                                         | monoclinic                                                          | monoclinic                                                         | monoclinic                                                         | monoclinic                                                          | monoclinic                                                          |
| Space group                                                  | <i>P</i> 2 <sub>1</sub> / <i>n</i>                                 | <i>P</i> 2 <sub>1</sub> / <i>n</i>                                  | <i>P</i> 2 <sub>1</sub> / <i>n</i>                                 | <i>P</i> 2 <sub>1</sub> / <i>n</i>                                 | <i>P</i> 2 <sub>1</sub> / <i>n</i>                                  | <i>P</i> 2 <sub>1</sub> / <i>n</i>                                  |
| <i>a</i> / Å                                                 | 8.4815(4)                                                          | 8.4971(3)                                                           | 8.5401(5)                                                          | 8.5815(4)                                                          | 8.6022(3)                                                           | 8.6181(4)                                                           |
| <i>b</i> / Å                                                 | 9.9987(5)                                                          | 10.0240(4)                                                          | 10.0947(5)                                                         | 10.1622(5)                                                         | 10.1941(4)                                                          | 10.2163(4)                                                          |
| <i>c</i> / Å                                                 | 16.3984(9)                                                         | 16.4110(6)                                                          | 16.4597(9)                                                         | 16.5208(9)                                                         | 16.5527(6)                                                          | 16.5785(7)                                                          |
| $\beta$ / °                                                  | 93.1310(10)                                                        | 93.1650(7)                                                          | 93.2083(10)                                                        | 93.2926(10)                                                        | 93.3872(7)                                                          | 93.4701(9)                                                          |
| <i>V</i> / Å <sup>3</sup>                                    | 1388.57(12)                                                        | 1395.67(9)                                                          | 1416.76(13)                                                        | 1438.35(13)                                                        | 1449.00(9)                                                          | 1456.98(11)                                                         |
| <i>Z</i>                                                     | 2                                                                  | 2                                                                   | 2                                                                  | 2                                                                  | 2                                                                   | 2                                                                   |
| $\rho_{\text{calc}}$ / (g/cm <sup>3</sup> )                  | 1.775                                                              | 1.766                                                               | 1.740                                                              | 1.714                                                              | 1.701                                                               | 1.692                                                               |
| $\mu$ / mm <sup>-1</sup>                                     | 3.211                                                              | 3.195                                                               | 3.147                                                              | 3.100                                                              | 3.077                                                               | 3.061                                                               |
| <i>F</i> (000)                                               | 736.0                                                              | 736.0                                                               | 736.0                                                              | 736.0                                                              | 736.0                                                               | 736.0                                                               |
| Radiation                                                    | MoK $\alpha$ ( $\lambda$ = 0.71073)                                | MoK $\alpha$ ( $\lambda$ = 0.71073)                                 | MoK $\alpha$ ( $\lambda$ = 0.71073)                                | MoK $\alpha$ ( $\lambda$ = 0.71073)                                | MoK $\alpha$ ( $\lambda$ = 0.71073)                                 | MoK $\alpha$ ( $\lambda$ = 0.71073)                                 |
| 2 $\theta$ range for data collection / °                     | 4.774 to 56.556                                                    | 4.764 to 52.736                                                     | 4.736 to 56.546                                                    | 4.708 to 52.734                                                    | 4.694 to 52.744                                                     | 4.686 to 52.728                                                     |
| Index ranges                                                 | -11 ≤ <i>h</i> ≤ 11,<br>-13 ≤ <i>k</i> ≤ 8,<br>-21 ≤ <i>l</i> ≤ 16 | -10 ≤ <i>h</i> ≤ 10,<br>-12 ≤ <i>k</i> ≤ 12,<br>-20 ≤ <i>l</i> ≤ 20 | -11 ≤ <i>h</i> ≤ 11,<br>-13 ≤ <i>k</i> ≤ 8,<br>-16 ≤ <i>l</i> ≤ 21 | -10 ≤ <i>h</i> ≤ 10,<br>-12 ≤ <i>k</i> ≤ 8,<br>-16 ≤ <i>l</i> ≤ 20 | -10 ≤ <i>h</i> ≤ 10,<br>-12 ≤ <i>k</i> ≤ 12,<br>-20 ≤ <i>l</i> ≤ 20 | -10 ≤ <i>h</i> ≤ 10,<br>-12 ≤ <i>k</i> ≤ 12,<br>-19 ≤ <i>l</i> ≤ 20 |
| Reflections collected                                        | 9355                                                               | 15588                                                               | 10118                                                              | 8953                                                               | 16262                                                               | 11766                                                               |
| <i>R</i> <sub>int</sub> / <i>R</i> <sub>sigma</sub>          | 0.0303 / 0.0364                                                    | 0.0329 / 0.0223                                                     | 0.0330 / 0.0390                                                    | 0.0314 / 0.0343                                                    | 0.0373 / 0.0255                                                     | 0.0347 / 0.0314                                                     |
| Data/restraints/parameters                                   | 3444/1/202                                                         | 2861/0/202                                                          | 3517/0/202                                                         | 2938/0/202                                                         | 2963/0/202                                                          | 2977/0/202                                                          |
| Goodness-of-fit on <i>F</i> <sup>2</sup>                     | 1.050                                                              | 1.101                                                               | 1.050                                                              | 1.070                                                              | 1.091                                                               | 1.057                                                               |
| Final <i>R</i> indexes [ <i>I</i> ≥ 2 $\sigma$ ( <i>I</i> )] | <i>R</i> <sub>1</sub> = 0.0341,<br><i>wR</i> <sub>2</sub> = 0.0697 | <i>R</i> <sub>1</sub> = 0.0295,<br><i>wR</i> <sub>2</sub> = 0.0633  | <i>R</i> <sub>1</sub> = 0.0391,<br><i>wR</i> <sub>2</sub> = 0.0760 | <i>R</i> <sub>1</sub> = 0.0373,<br><i>wR</i> <sub>2</sub> = 0.0815 | <i>R</i> <sub>1</sub> = 0.0358,<br><i>wR</i> <sub>2</sub> = 0.0812  | <i>R</i> <sub>1</sub> = 0.0377,<br><i>wR</i> <sub>2</sub> = 0.0849  |
| Final <i>R</i> indexes [all data]                            | <i>R</i> <sub>1</sub> = 0.0461,<br><i>wR</i> <sub>2</sub> = 0.0739 | <i>R</i> <sub>1</sub> = 0.0351,<br><i>wR</i> <sub>2</sub> = 0.0649  | <i>R</i> <sub>1</sub> = 0.0585,<br><i>wR</i> <sub>2</sub> = 0.0821 | <i>R</i> <sub>1</sub> = 0.0514,<br><i>wR</i> <sub>2</sub> = 0.0870 | <i>R</i> <sub>1</sub> = 0.0475,<br><i>wR</i> <sub>2</sub> = 0.0855  | <i>R</i> <sub>1</sub> = 0.0577,<br><i>wR</i> <sub>2</sub> = 0.0930  |
| Largest diff. peak/hole / (e Å <sup>-3</sup> )               | 0.75/-0.64                                                         | 0.64/-0.51                                                          | 0.79/-0.63                                                         | 0.72/-0.56                                                         | 0.76/-0.58                                                          | 0.90/-0.60                                                          |

**Table S1 continued** - Crystal data and refinement results for **A** at 325 K and 350 K.

|                                                                   | <b>325(2) K</b>                                                                                  | <b>350(2) K</b>                                                                                   |
|-------------------------------------------------------------------|--------------------------------------------------------------------------------------------------|---------------------------------------------------------------------------------------------------|
| Empirical formula                                                 | C <sub>26</sub> H <sub>20</sub> FeN <sub>14</sub> Se <sub>2</sub>                                | C <sub>26</sub> H <sub>20</sub> FeN <sub>14</sub> Se <sub>2</sub>                                 |
| Formula weight                                                    | 742.33                                                                                           | 742.33                                                                                            |
| Temperature / K                                                   | 325(2)                                                                                           | 350(2)                                                                                            |
| Crystal system                                                    | monoclinic                                                                                       | monoclinic                                                                                        |
| Space group                                                       | <i>P</i> 2 <sub>1</sub> / <i>n</i>                                                               | <i>P</i> 2 <sub>1</sub> / <i>n</i>                                                                |
| <i>a</i> / Å                                                      | 8.6327(5)                                                                                        | 8.6423(4)                                                                                         |
| <i>b</i> / Å                                                      | 10.2367(6)                                                                                       | 10.2507(4)                                                                                        |
| <i>c</i> / Å                                                      | 16.6049(10)                                                                                      | 16.6132(7)                                                                                        |
| $\beta$ / °                                                       | 93.4981(11)                                                                                      | 93.5248(9)                                                                                        |
| <i>V</i> / Å <sup>3</sup>                                         | 1464.65(15)                                                                                      | 1468.97(11)                                                                                       |
| <i>Z</i>                                                          | 2                                                                                                | 2                                                                                                 |
| $\rho_{\text{calc}}$ / (g/cm <sup>3</sup> )                       | 1.683                                                                                            | 1.678                                                                                             |
| $\mu$ / mm <sup>-1</sup>                                          | 3.045                                                                                            | 3.036                                                                                             |
| <i>F</i> (000)                                                    | 736.0                                                                                            | 736.0                                                                                             |
| Radiation                                                         | MoK $\alpha$ ( $\lambda$ = 0.71073)                                                              | MoK $\alpha$ ( $\lambda$ = 0.71073)                                                               |
| 2 $\theta$ range for data collection / °                          | 4.676 to 52.734                                                                                  | 4.672 to 52.746                                                                                   |
| Index ranges                                                      | -10 $\leq$ <i>h</i> $\leq$ 10,<br>-12 $\leq$ <i>k</i> $\leq$ 8,<br>-20 $\leq$ <i>l</i> $\leq$ 16 | -10 $\leq$ <i>h</i> $\leq$ 10,<br>-12 $\leq$ <i>k</i> $\leq$ 12,<br>-19 $\leq$ <i>l</i> $\leq$ 20 |
| Reflections collected                                             | 8669                                                                                             | 14266                                                                                             |
| <i>R</i> <sub>int</sub> / <i>R</i> <sub>sigma</sub>               | 0.0338 / 0.0394                                                                                  | 0.0379 / 0.0306                                                                                   |
| Data/restraints/parameters                                        | 2992/0/202                                                                                       | 3004/0/202                                                                                        |
| Goodness-of-fit on <i>F</i> <sup>2</sup>                          | 1.045                                                                                            | 1.070                                                                                             |
| Final <i>R</i> indexes [ <i>I</i> $\geq$ 2 $\sigma$ ( <i>I</i> )] | <i>R</i> <sub>1</sub> = 0.0406,<br><i>wR</i> <sub>2</sub> = 0.0894                               | <i>R</i> <sub>1</sub> = 0.0408,<br><i>wR</i> <sub>2</sub> = 0.0900                                |
| Final <i>R</i> indexes [all data]                                 | <i>R</i> <sub>1</sub> = 0.0720,<br><i>wR</i> <sub>2</sub> = 0.1041                               | <i>R</i> <sub>1</sub> = 0.0657,<br><i>wR</i> <sub>2</sub> = 0.1013                                |
| Largest diff. peak/hole / (e Å <sup>-3</sup> )                    | 0.87/-0.61                                                                                       | 0.93/-0.64                                                                                        |

**Table S2** - Unit cell and structural parameters for [Fe(abpt)<sub>2</sub>(NCSe)<sub>2</sub>] polymorph **A** collected at 225 K (~T<sub>1/2</sub>) during cooling (↓) and warming (↑) cycles.

| Temperature                               |                                    | 225(2) K (↓)                                                      | 225(2) K (↑)                                                      |
|-------------------------------------------|------------------------------------|-------------------------------------------------------------------|-------------------------------------------------------------------|
| Empirical formula                         |                                    | FeC <sub>26</sub> H <sub>20</sub> N <sub>14</sub> Se <sub>2</sub> | FeC <sub>26</sub> H <sub>20</sub> N <sub>14</sub> Se <sub>2</sub> |
| Crystal system                            |                                    | Monoclinic                                                        | Monoclinic                                                        |
| Space group                               |                                    | <i>P</i> 2 <sub>1</sub> / <i>n</i>                                | <i>P</i> 2 <sub>1</sub> / <i>n</i>                                |
| Unit cell dimensions                      | <i>a</i> , <i>b</i> , <i>c</i> / Å | 8.5401(5), 10.0947(5), 16.4597(9)                                 | 8.5410(5), 10.0946(5), 16.4604(9)                                 |
|                                           | <i>α</i> , <i>β</i> , <i>γ</i> / ° | 90, 93.2083(10), 90                                               | 90, 93.2069(11), 90                                               |
|                                           | <i>V</i> / Å <sup>3</sup>          | 1416.76(13)                                                       | 1416.96(13)                                                       |
| <b>Z</b> , <b>Z'</b>                      |                                    | 2, 0.5                                                            | 2, 0.5                                                            |
| Bond length / Å                           | Fe1-N7                             | 2.032(3)                                                          | 2.030(3)                                                          |
|                                           | Fe1-N1                             | 2.096(2)                                                          | 2.094(3)                                                          |
|                                           | Fe1-N2                             | 2.027(2)                                                          | 2.029(3)                                                          |
| <b>V</b> <sub>poly</sub> / Å <sup>3</sup> |                                    | 11.234(8)                                                         | 11.224(9)                                                         |
| <b>Σ</b> / °                              |                                    | 59.0(6)                                                           | 58.8(7)                                                           |
| <b>Θ</b> / °                              |                                    | 229.4(11)                                                         | 228.6(12)                                                         |

**Table S3** - Fe-N bond lengths for all structures, along with the distortion parameter, **Σ**, and the volume of the Fe octahedron, **V<sub>p</sub>**.

|                                                    | 50(2) K   | 75(2) K   | 100(2) K  | 108(2) K  | 200(2) K  | 250(2) K   | 300(2) K   | 350(2) K   |
|----------------------------------------------------|-----------|-----------|-----------|-----------|-----------|------------|------------|------------|
| Fe1-N1 / Å                                         | 1.949(2)  | 1.951(2)  | 1.950(2)  | 1.952(2)  | 1.973(2)  | 2.098(3)   | 2.133(3)   | 2.142(4)   |
| Fe1-N2 / Å                                         | 2.014(2)  | 2.016(2)  | 2.014(2)  | 2.015(2)  | 2.032(2)  | 2.168(3)   | 2.207(3)   | 2.213(3)   |
| Fe1-N3 / Å                                         | 1.957(2)  | 1.957(2)  | 1.955(2)  | 1.957(2)  | 1.974(2)  | 2.086(3)   | 2.119(3)   | 2.124(3)   |
| <b>Σ</b> <sup>a</sup> / °                          | 49.6(6)   | 49.8(6)   | 49.9(6)   | 49.6(5)   | 52.3(5)   | 65.5(7)    | 69.4(7)    | 70.0(8)    |
| <b>V<sub>p</sub></b> <sup>b</sup> / Å <sup>3</sup> | 10.075(7) | 10.090(7) | 10.067(7) | 10.090(6) | 10.358(7) | 12.259(10) | 12.839(10) | 12.946(12) |

<sup>a</sup> **Σ**, the angle distortion parameter, is the sum of the absolute value of the deviation of all 12 *cis* N-Fe-N angles from 90°. <sup>b</sup> **V<sub>p</sub>** is the volume of the Fe octahedron calculated in Olex2.

**Table S4** - Summary of the hydrogen bonding parameters in **A** as a function of temperature.

| Temperature           | D-H...A                                                              | D-H / Å                    | H...A / Å                  | D...A / Å                        | <D-H...A /°             |
|-----------------------|----------------------------------------------------------------------|----------------------------|----------------------------|----------------------------------|-------------------------|
| 375(2) K              | N6-H6B...N7<br>C2-H2...N4 <sup>i</sup><br>N6-H6A...Se1 <sup>ii</sup> | 0.87(5)<br>0.93<br>0.98(5) | 2.16(5)<br>2.80<br>2.76(5) | 2.860(5)<br>3.580(6)<br>3.563(4) | 137(4)<br>143<br>140(4) |
| 350(2) K              | N6-H6B...N7<br>C2-H2...N4 <sup>i</sup><br>N6-H6A...Se1 <sup>ii</sup> | 0.86(5)<br>0.93<br>1.00(5) | 2.17(5)<br>2.79<br>2.75(4) | 2.856(5)<br>3.575(5)<br>3.554(4) | 137(4)<br>142<br>137(3) |
| 325(2) K              | N6-H6B...N7<br>C2-H2...N4 <sup>i</sup><br>N6-H6A...Se1 <sup>ii</sup> | 0.89(5)<br>0.93<br>0.97(5) | 2.13(5)<br>2.79<br>2.75(5) | 2.856(5)<br>3.571(5)<br>3.547(4) | 139(4)<br>142<br>139(3) |
| 300(2) K              | N6-H6B...N7<br>C2-H2...N4 <sup>i</sup><br>N6-H6A...Se1 <sup>ii</sup> | 0.84(4)<br>0.93<br>1.00(4) | 2.18(4)<br>2.78<br>2.68(4) | 2.860(4)<br>3.559(5)<br>3.541(4) | 138(4)<br>142<br>144(3) |
| 275(2) K              | N6-H6B...N7<br>C2-H2...N4 <sup>i</sup><br>N6-H6A...Se1 <sup>ii</sup> | 0.86(4)<br>0.93<br>0.99(4) | 2.15(4)<br>2.75<br>2.71(4) | 2.855(4)<br>3.530(4)<br>3.535(3) | 140(3)<br>142<br>141(3) |
| 250(2) K              | N6-H6B...N7<br>C2-H2...N4 <sup>i</sup><br>N6-H6A...Se1 <sup>ii</sup> | 0.85(4)<br>0.94<br>1.05(4) | 2.15(4)<br>2.69<br>2.65(4) | 2.860(4)<br>3.477(4)<br>3.519(3) | 140(3)<br>142<br>141(3) |
| 225(2) K              | N6-H6B...N7<br>C2-H2...N4 <sup>i</sup><br>N6-H6A...Se1 <sup>ii</sup> | 0.86(4)<br>0.93<br>0.97(4) | 2.16(4)<br>2.54<br>2.72(4) | 2.858(4)<br>3.313(4)<br>3.502(3) | 137(3)<br>141<br>138(3) |
| 200(2) K              | N6-H6B...N7<br>C2-H2...N4 <sup>i</sup><br>N6-H6A...Se1 <sup>ii</sup> | 0.90(3)<br>0.95<br>1.00(3) | 2.12(3)<br>2.39<br>2.66(3) | 2.852(3)<br>3.181(3)<br>3.490(3) | 137(3)<br>140<br>141(2) |
| 175(2) K              | N6-H6B...N7<br>C2-H2...N4 <sup>i</sup><br>N6-H6A...Se1 <sup>ii</sup> | 0.90(3)<br>0.95<br>0.97(2) | 2.14(3)<br>2.36<br>2.66(2) | 2.856(3)<br>3.145(3)<br>3.484(3) | 136(3)<br>140<br>143(2) |
| 150(2) K              | N6-H6B...N7<br>C2-H2...N4 <sup>i</sup><br>N6-H6A...Se1 <sup>ii</sup> | 0.92(3)<br>0.95<br>0.99(3) | 2.11(3)<br>2.35<br>2.65(3) | 2.850(3)<br>3.136(3)<br>3.479(3) | 137(3)<br>140<br>142(2) |
| 125(2) K              | N6-H6B...N7<br>C2-H2...N4 <sup>i</sup><br>N6-H6A...Se1 <sup>ii</sup> | 0.94(3)<br>0.95<br>0.96(5) | 2.09(3)<br>2.35<br>2.65(5) | 2.853(3)<br>3.132(3)<br>3.476(2) | 138(2)<br>140<br>145(2) |
| 108(2) K              | N6-H6B...N7<br>C2-H2...N4 <sup>i</sup><br>N6-H6A...Se1 <sup>ii</sup> | 0.90(3)<br>0.95<br>0.95(3) | 2.12(3)<br>2.35<br>2.69(3) | 2.855(3)<br>3.134(3)<br>3.476(2) | 139(3)<br>140<br>141(2) |
| 100(2) K              | N6-H6B...N7<br>C2-H2...N4 <sup>i</sup><br>N6-H6A...Se1 <sup>ii</sup> | 0.92(4)<br>0.95<br>0.94(3) | 2.10(3)<br>2.34<br>2.68(3) | 2.852(4)<br>3.135(4)<br>3.470(3) | 139(3)<br>140<br>142(3) |
| 75(2) K               | N6-H6B...N7<br>C2-H2...N4 <sup>i</sup><br>N6-H6A...Se1 <sup>ii</sup> | 0.93(3)<br>0.95<br>0.97(3) | 2.11(3)<br>2.34<br>2.67(3) | 2.851(3)<br>3.132(3)<br>3.469(2) | 136(3)<br>140<br>140(2) |
| 50(2) K               | N6-H6B...N7<br>C2-H2...N4 <sup>i</sup><br>N6-H6A...Se1 <sup>ii</sup> | 0.92(4)<br>0.95<br>0.96(3) | 2.10(3)<br>2.35<br>2.66(3) | 2.853(3)<br>3.134(3)<br>3.465(3) | 137(3)<br>140<br>141(3) |
| 30(2) K               | N6-H6B...N7<br>C2-H2...N4 <sup>i</sup><br>N6-H6A...Se1 <sup>ii</sup> | 0.91(4)<br>0.95<br>0.95(4) | 2.14(3)<br>2.35<br>2.65(4) | 2.855(4)<br>3.133(4)<br>3.467(3) | 135(3)<br>140<br>144(3) |
| 30(2) K<br>LIESST HS* | N6-H6B...N7<br>C2-H2...N4 <sup>i</sup><br>N6-H6A...Se1 <sup>ii</sup> | 0.91(5)<br>0.93<br>0.98(5) | 2.13(4)<br>2.73<br>2.69(5) | 2.853(4)<br>3.506(5)<br>3.503(3) | 136(4)<br>142<br>140(3) |

(i) 1-x, 1-y, 1-z; (ii) 1/2+x, 3/2-y, 1/2+z.

**Table S5** - Summary of the  $\pi$ - $\pi$  contacts in **A**.

| Temperature           | Plane 1     | Plane 2                   | Centroid-centroid distance / Å | Offset / Å |
|-----------------------|-------------|---------------------------|--------------------------------|------------|
| 375(2) K              | (N2, C2-C6) | (N7, C9-C13) <sup>i</sup> | 3.725(2)                       | 1.366(7)   |
| 350(2) K              | (N2, C2-C6) | (N7, C9-C13) <sup>i</sup> | 3.710(2)                       | 1.354(7)   |
| 325(2) K              | (N2, C2-C6) | (N7, C9-C13) <sup>i</sup> | 3.698(2)                       | 1.344(7)   |
| 300(2) K              | (N2, C2-C6) | (N7, C9-C13) <sup>i</sup> | 3.688(2)                       | 1.338(6)   |
| 275(2) K              | (N2, C2-C6) | (N7, C9-C13) <sup>i</sup> | 3.679(2)                       | 1.338(5)   |
| 250(2) K              | (N2, C2-C6) | (N7, C9-C13) <sup>i</sup> | 3.678(2)                       | 1.354(6)   |
| 225(2) K              | (N2, C2-C6) | (N7, C9-C13) <sup>i</sup> | 3.693(2)                       | 1.403(5)   |
| 200(2) K              | (N2, C2-C6) | (N7, C9-C13) <sup>i</sup> | 3.707(2)                       | 1.449(4)   |
| 175(2) K              | (N2, C2-C6) | (N7, C9-C13) <sup>i</sup> | 3.703(2)                       | 1.448(4)   |
| 150(2) K              | (N2, C2-C6) | (N7, C9-C13) <sup>i</sup> | 3.692(1)                       | 1.443(4)   |
| 125(2) K              | (N2, C2-C6) | (N7, C9-C13) <sup>i</sup> | 3.684(1)                       | 1.432(4)   |
| 108(2) K              | (N2, C2-C6) | (N7, C9-C13) <sup>i</sup> | 3.682(1)                       | 1.434(4)   |
| 100(2) K              | (N2, C2-C6) | (N7, C9-C13) <sup>i</sup> | 3.678(2)                       | 1.432(4)   |
| 75(2) K               | (N2, C2-C6) | (N7, C9-C13) <sup>i</sup> | 3.670(2)                       | 1.423(4)   |
| 50(2) K               | (N2, C2-C6) | (N7, C9-C13) <sup>i</sup> | 3.664(2)                       | 1.415(4)   |
| 30(2) K               | (N2, C2-C6) | (N7, C9-C13) <sup>i</sup> | 3.663(2)                       | 1.417(4)   |
| 30(2) K<br>LIESST HS* | (N2, C2-C6) | (N7, C9-C13) <sup>i</sup> | 3.591(2)                       | 1.263(5)   |

(i) 1-x, 2-y, 1-z;
